# Supplementary material for: The Impact of Learning by Thought on Violations of Independence and Coalescing
Source: Atypon-hosted journal article supplement (doi:10.1287/deca.2015.0316), 2015-07-10
Supplement: deca.2015.0316-sm-appendix.pdf [file deca.2015.0316-sm-appendix.pdf]

**APPENDIX**

**A) Split Variant of Independence Tests**

| Property          | Lottery |       |       |       |       |       |       |       |       | Average |
|-------------------|---------|-------|-------|-------|-------|-------|-------|-------|-------|---------|
|                   | No.     | $p_1$ | $p_2$ | $p_3$ | $p_4$ | $q_1$ | $q_2$ | $q_3$ | $q_4$ | % R     |
|                   |         | $s_1$ | $s_2$ | $s_3$ | $s_4$ | $r_1$ | $r_2$ | $r_3$ | $r_4$ |         |
| CCE1 <sub>s</sub> | 3       | 0.89  | 0.01  | 0.10  |       | 0.89  | 0.01  | 0.10  |       | 88      |
|                   |         | 0     | 16    | 16    |       | 0     | 0     | 32    |       |         |
|                   | 4       | 0.01  | 0.89  | 0.10  |       | 0.01  | 0.89  | 0.10  |       | 85      |
|                   |         | 16    | 16    | 16    |       | 0     | 16    | 32    |       |         |
| CCE2 <sub>s</sub> | 7       | 0.80  | 0.10  | 0.10  |       | 0.80  | 0.10  | 0.10  |       | 30      |
|                   |         | 0     | 19    | 19    |       | 0     | 0     | 44    |       |         |
|                   | 8       | 0.10  | 0.80  | 0.10  |       | 0.10  | 0.80  | 0.10  |       | 53      |
|                   |         | 19    | 19    | 19    |       | 0     | 19    | 44    |       |         |
| CCE3 <sub>s</sub> | 11      | 0.70  | 0.10  | 0.10  | 0.10  | 0.70  | 0.10  | 0.10  | 0.10  | 24      |
|                   |         | 0     | 21    | 21    | 21    | 0     | 0     | 21    | 42    |         |
|                   | 12      | 0.70  | 0.10  | 0.10  | 0.10  | 0.70  | 0.10  | 0.10  | 0.10  | 21      |
|                   |         | 0     | 21    | 21    | 42    | 0     | 0     | 42    | 42    |         |
| CCE4 <sub>s</sub> | 7       | 0.80  | 0.10  | 0.10  |       | 0.80  | 0.10  | 0.10  |       | 30      |
|                   |         | 0     | 19    | 19    |       | 0     | 0     | 44    |       |         |
|                   | 14      | 0.40  | 0.10  | 0.10  | 0.40  | 0.40  | 0.10  | 0.10  | 0.40  | 50      |
|                   |         | 0     | 19    | 19    | 44    | 0     | 0     | 44    | 44    |         |
| CRE1 <sub>s</sub> | 17      | 0.98  | 0.01  | 0.01  |       | 0.98  | 0.01  | 0.01  |       | 57      |
|                   |         | 0     | 23    | 23    |       | 0     | 0     | 46    |       |         |
|                   | 18      | 0.50  | 0.50  |       |       | 0.50  | 0.50  |       |       | 12      |
|                   |         | 23    | 23    |       |       | 0     | 46    |       |       |         |
| CRE2 <sub>s</sub> | 21      | 0.80  | 0.06  | 0.14  |       | 0.80  | 0.06  | 0.14  |       | 21      |
|                   |         | 0     | 28    | 28    |       | 0     | 0     | 45    |       |         |
|                   | 22      | 0.40  | 0.18  | 0.42  |       | 0.40  | 0.18  | 0.42  |       | 27      |
|                   |         | 0     | 28    | 28    |       | 0     | 0     | 45    |       |         |
| UTI <sub>s</sub>  | 31      | 0.73  | 0.01  | 0.01  | 0.25  | 0.73  | 0.01  | 0.01  | 0.25  | 72      |
|                   |         | 0     | 15    | 15    | 60    | 0     | 0     | 33    | 60    |         |
|                   | 32      | 0.73  | 0.01  | 0.01  | 0.25  | 0.73  | 0.01  | 0.01  | 0.25  | 72      |
|                   |         | 0     | 15    | 15    | 33    | 0     | 0     | 33    | 33    |         |
| LTI <sub>s</sub>  | 35      | 0.75  | 0.23  | 0.01  | 0.01  | 0.75  | 0.23  | 0.01  | 0.01  | 91      |
|                   |         | 1     | 34    | 36    | 36    | 1     | 33    | 33    | 60    |         |

|      |    |      |      |      |      |      |      |      |      |    |
|------|----|------|------|------|------|------|------|------|------|----|
|      | 36 | 0.75 | 0.23 | 0.01 | 0.01 | 0.75 | 0.23 | 0.01 | 0.01 | 88 |
|      |    | 33   | 34   | 36   | 36   | 33   | 33   | 33   | 60   |    |
| UCIs | 37 | 0.20 | 0.20 | 0.60 |      | 0.20 | 0.20 | 0.60 |      | 74 |
|      |    | 9    | 10   | 24   |      | 3    | 21   | 24   |      |    |
|      | 39 | 0.20 | 0.20 | 0.60 |      | 0.20 | 0.20 | 0.60 |      | 81 |
|      |    | 9    | 9    | 21   |      | 3    | 21   | 21   |      |    |

## B) Instructions (translated from German to English)

Welcome to this session in which you have to make decisions between gambles. There are no right or wrong decisions, we just want to learn about your individual preferences. You will receive sequentially four booklets. In each booklet you have to make 44 choices between two gambles. An example for such a choice appears below.

\*\*\* See Fig. 1 in the main text \*\*\*

If you would choose gamble A in this example you win 20 Euro with a probability of 50%, 30 Euro with a probability of 30%, and 40 Euro with a probability of 20%. If you choose gamble B, you win 10 Euro with a probability of 33%, 15 Euro with a probability of 34% and 60 Euro with a probability of 33%. To determine the amount to win we use this black urn which contains 100 tickets, numbered from 1 to 100. Note that in all gambles we ordered monetary prizes from lowest to highest and the higher the number on the ticket drawn from the urn, the higher will be the prize you win. Suppose you have chosen gamble A. Then for tickets from 1 to 50 (i.e. with 50% probability) you will win 20 Euro, for tickets 51-80 (i.e. with 30% probability) you will win 30 Euro and for tickets 81-100 (i.e. with 20% probability) you will win 40 Euro. If you have chosen gamble B you win 10 Euros for tickets 1-33, 15 Euros for tickets 34-67, and 60 Euro for tickets 68-100.

We will pay out only one of your choices for real cash at the end of the session. To determine which choice this is, we have two additional urns. We will first draw a ticket from the red urn which contains tickets numbered from 1 to 4. The drawn ticket determines which of the four booklets is relevant for payout. Then we will draw a ticket from the blue urn which contains tickets numbered from 1 to 44. This ticket determines which of the 44 choices from the booklet is relevant for payout. In this way we determine the pair of gambles which is relevant for your payout and you will play the gamble you have chosen. Therefore, you should always choose the gamble you will like most. Now you have to answer four test questions before we start with the session. If you have any questions now or during the session, please raise your hand and one of the experimenters will come to you.
